# Supplementary material for: Hierarchical NiMn-LDH Hollow Spheres as a Promising Pseudocapacitive Electrode for Supercapacitor Application
Source: MDPI journal article supplement (doi:10.3390/mi14020487), 2023-02-19
Supplement: s1 [file s1]

# Hierarchical NiMn-LDH hollow spheres as a promising pseudocapacitive electrode for hybrid type supercapacitor application

Jai Kumar<sup>1</sup>, Rana R. Neiber<sup>1,2</sup>, Zaheer Abbas<sup>3</sup>, Razium Ali Soomro<sup>4,\*</sup>, Amal BaQais<sup>5</sup>, Mohammed A. Amin<sup>6</sup>, Zeinhom M. El-Bahy<sup>7</sup>

- <sup>1</sup> College of Chemical Engineering, University of Chinese Academy of Sciences, 19 A Yuquan Road, Beijing, 100049, China
- <sup>2</sup> Beijing Key Laboratory of Ionic Liquids Clean Process, CAS Key Laboratory of Green, Process, and Engineering, Institute of Process Engineering, Chinese Academy of Sciences, 100190 Beijing, China
- <sup>3</sup> Metallurgy and Materials Engineering Department, University of Engineering and Technology, Taxila, Pakistan
- <sup>4</sup> State Key Laboratory of Organic-Inorganic Composites, Beijing Key Laboratory of Electrochemical Process and Technology for Materials, Beijing University of Chemical Technology, Beijing 100029, China
- <sup>5</sup> Department of chemistry, college of science, Princess Nourah Bint Abdulrahman university, P.O. Box 84428, Riyadh 11671, Saudi Arabia
- <sup>6</sup> Department of Chemistry, College of Science, Taif University, P.O. Box 11099, Taif 21944, Saudi Arabia
- <sup>7</sup> Department of Chemistry, Faculty of Science, Al-Azhar University, Nasr City 11884, Cairo, Egypt

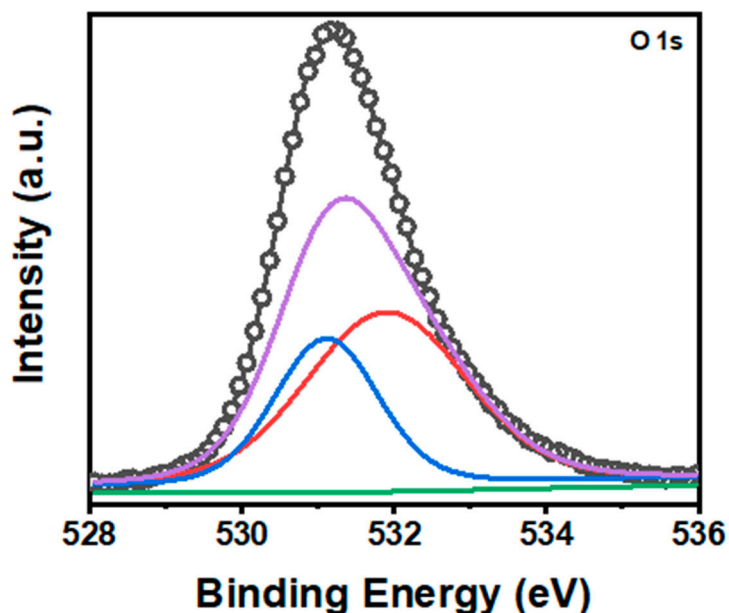

Figure S1. XPS fitting profile of O1s of NiMn-LDH-11.

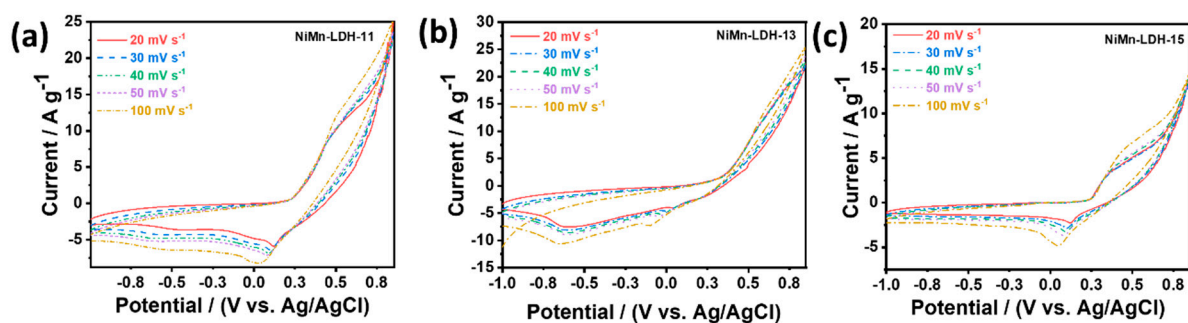

Figure S2. CV profile of (a) NiMn-LDH-13 and (b) NiMn-LDH-15 at different scan rates.

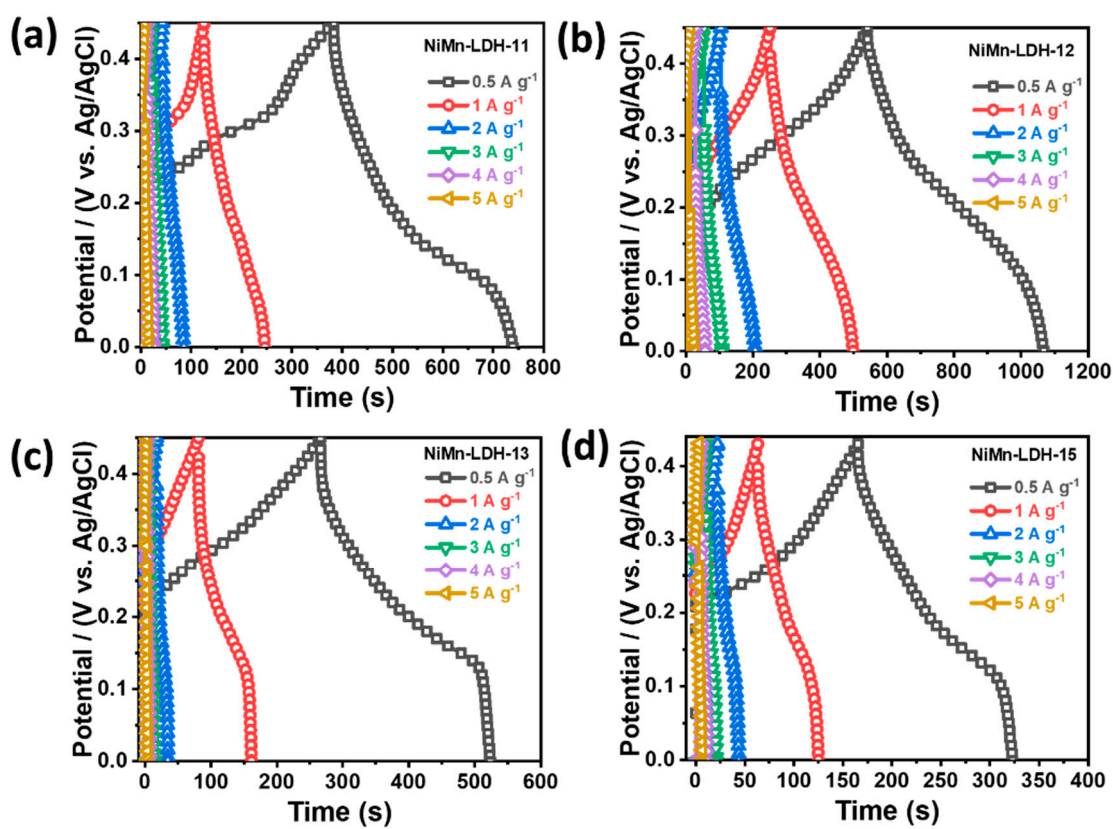

Figure S3. GCD profile of (a) NiMn-LDH-11, (b) NiMn-LDH-13 and (c) NiMn-LDH-13 at different scan rates.

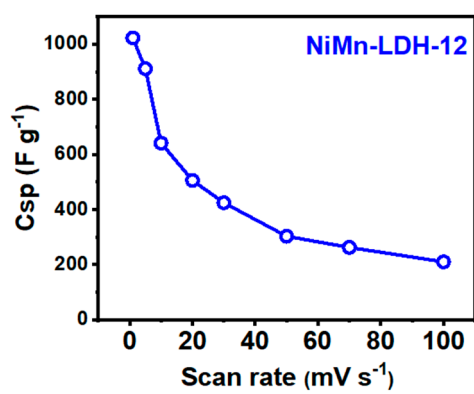

**Figure S4.** Specific capacitance profile calculated from the CV plots of NiMn-LDH-12 at different scan rates.
